# Supplementary material for: DNA methyltransferase 1 functions through C/ebpa to maintain hematopoietic stem and progenitor cells in zebrafish
Source: PubMed Central journal article supplement (PMC4372312; doi:10.1186/s13045-015-0115-7), 2015-02-22
Supplement: 13045_2015_115_MOESM1_ESM.pdf [file 13045_2015_115_MOESM1_ESM.pdf]

Figure S1 .

A

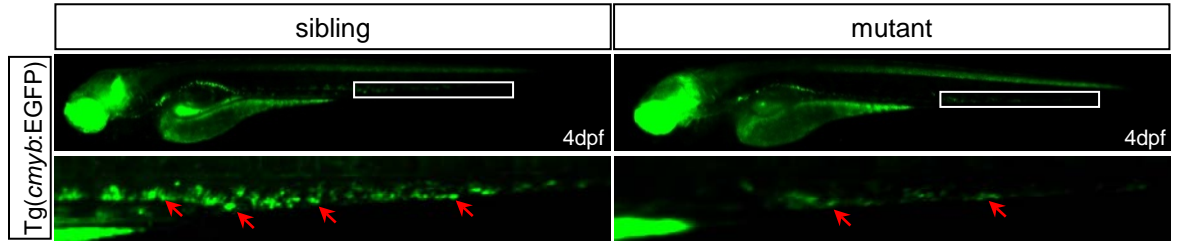

B

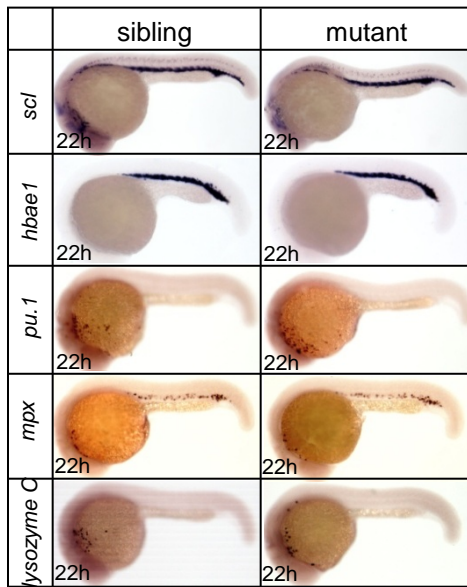

C

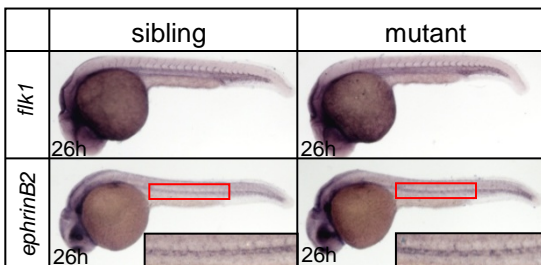

Figure S2.

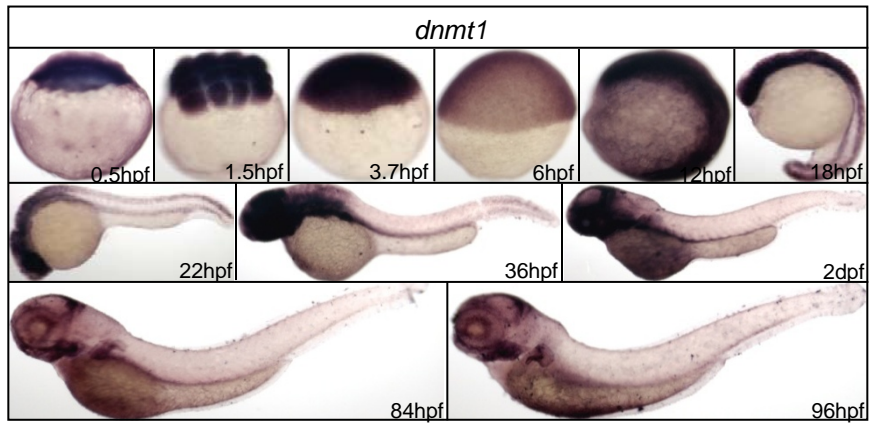

Figure S3.

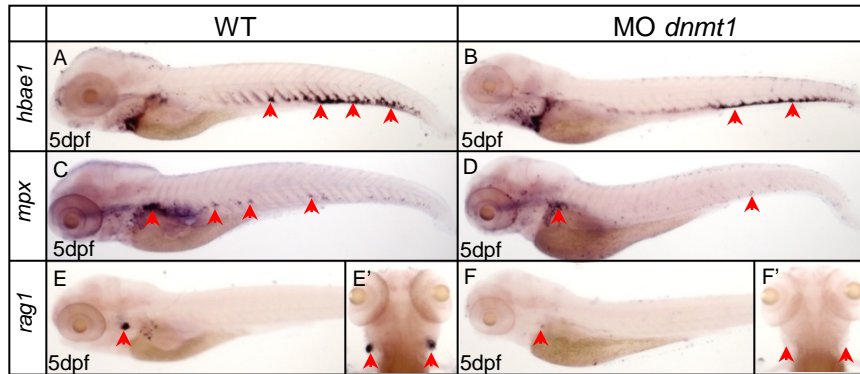

Figure S4.

A

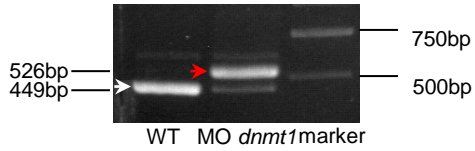

B

|             |                                                                        |
|-------------|------------------------------------------------------------------------|
| WT          | ALWDDGEKMFHAHWFCRGTDTVLGESSDPLELFLVDECEDMQLSFIHGKVN VFYKAPSEN          |
| Mutant      | ALWDDGEKMFHAHWFCRGTDTVLGESSDPLELFLVDECEDMQLSFIHGKVN VFYKAPSEN          |
| Splicing MO | ALWDDGEKMFHAHWFCRGTDTVLGESSDPLELFLVDECEDMQLSFIHGKVN VFYKAPSEN<br>***** |
| WT          | WYMEGGMEDEDIKVIDDDGESFFYQLHYEGECARFETPPKVT PSEDCKYKFCASCTRNER          |
| Mutant      | WYMEGGMEDEDIKVIDDDGESFF-----                                           |
| Splicing MO | WYMEVHAPKCGQCLCLTNWAEVLTLLLF-----<br>****                              |

Figure S5.

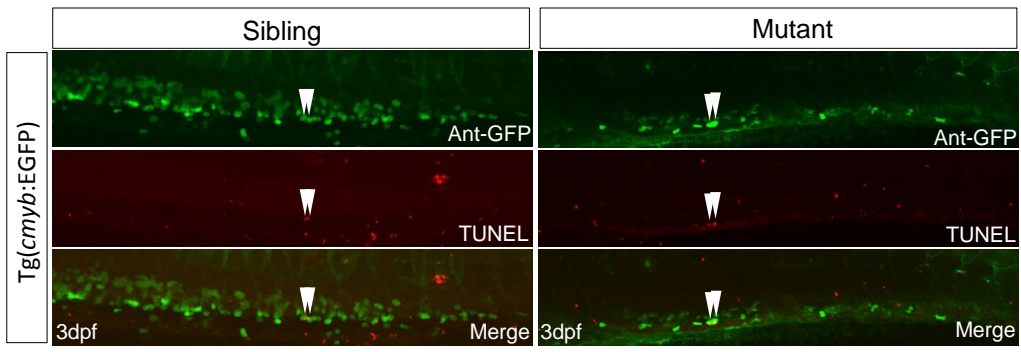

Figure S6.

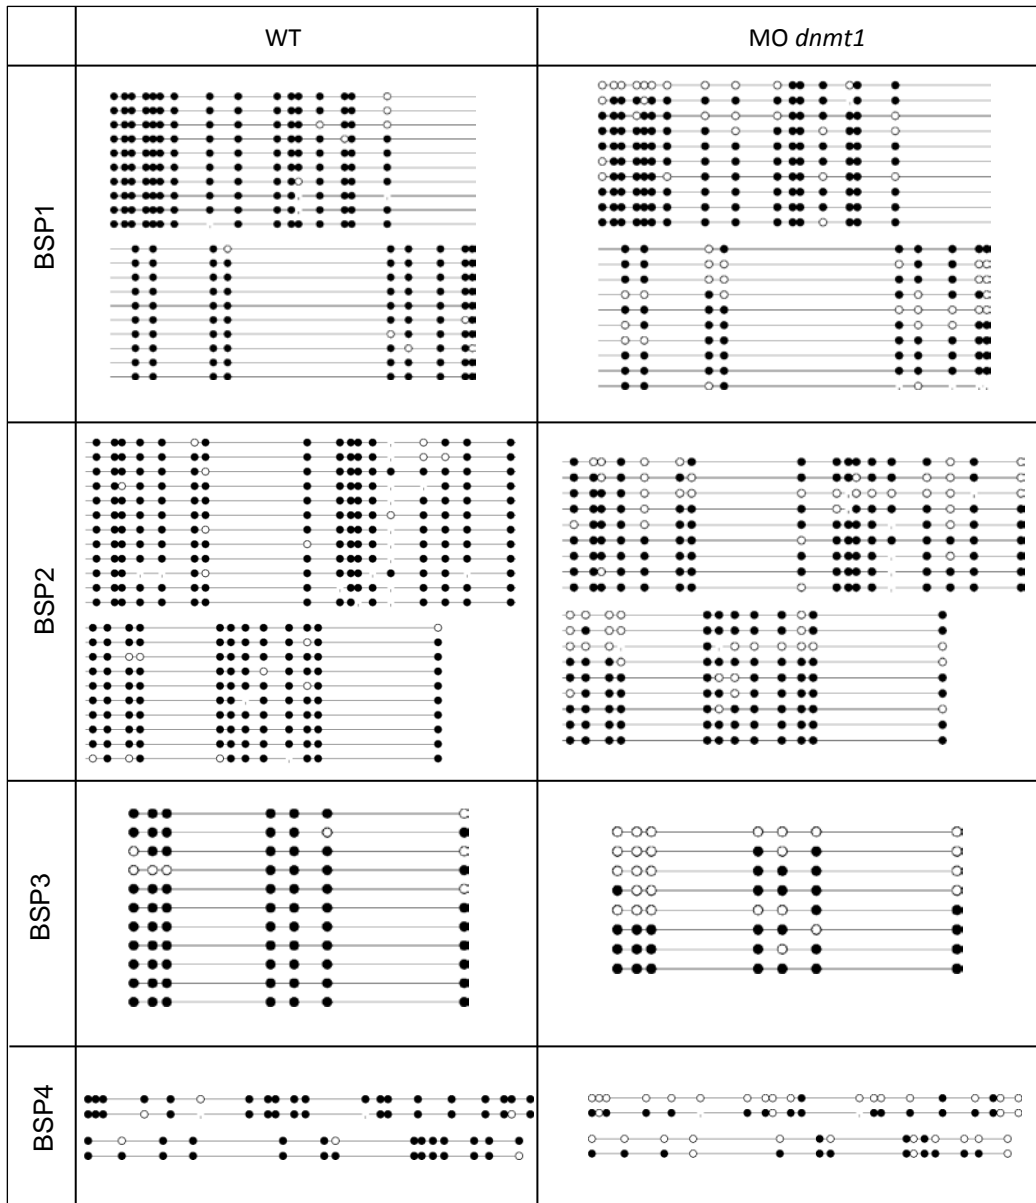

Figure S7.

|                | sumo2-cebpa<br>un-injected                                                                  |                                                                                             | sumo2-cebpa<br>injected                                                                     |
|----------------|---------------------------------------------------------------------------------------------|---------------------------------------------------------------------------------------------|---------------------------------------------------------------------------------------------|
|                | sibling                                                                                     | mutant                                                                                      | mutant                                                                                      |
| <i>lfabp</i>   | 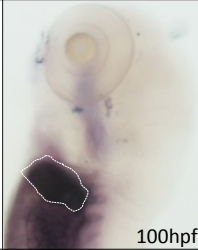<br>100hpf | <br>100hpf | <br>100hpf |
| <i>trypsin</i> | <br>100hpf | <br>100hpf | <br>100hpf |

Figure S8.

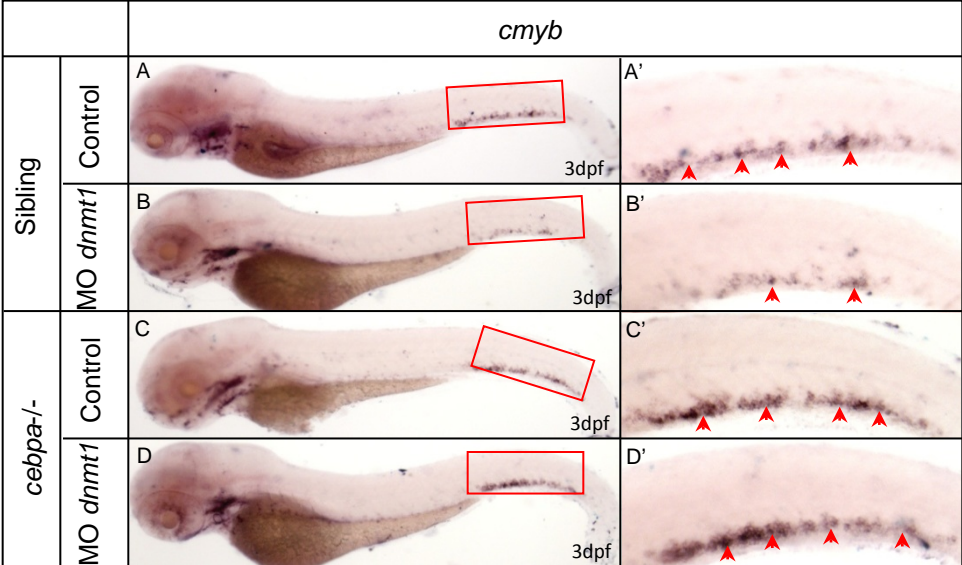



**Figure S1. WISH assays of hematopoietic markers of ldd794.** (A) EGFP positive cells in Tg(*cmyb*:EGFP) *dnmt1* mutant embryo were sharply decreased compared with wild-type siblings. (B) The primitive hematopoietic markers of mutant embryos were comparable with siblings at 22hpf. (C) The vascular markers *flk1* and *ephrinB2* were normal in ldd794 mutant.

**Figure S2. WISH analysis of *dnmt1*.** Zebrafish *dnmt1* was expressed ubiquitously.

**Figure S3. WISH analysis of erythroid, myeloid and lymphoid markers in *dnmt1* morphants.** The mature erythrocyte marker *hbae1* (A, B), myeloid-specific marker *mpx* (C, D) and lymphoid-specific marker *rag1* (E, E', F, F') were all decreased.

**Figure S4. The *dnmt1* splicing specific morpholino effectively affects splicing of precursor RNA.** (A) Wild-type *dnmt1* PCR product was 449bp (white arrow) and *dnmt1* splicing specific morpholino triggered abnormal spliced *dnmt1* PCR product was 526bp (red arrow). (B) The sequence result indicated that aberrant splicing leads to a 748AA truncated protein without DNA methylation catalytic domain.

**Figure S5. TUNEL assays in sibling and *dnmt1*<sup>-/-</sup> mutant.** Double positive cells in sibling and *dnmt1*<sup>-/-</sup> mutant were indicated by arrows.

**Figure S6. DNA methylation analysis of *cebpa* regulation region.** Bisulfite sequencing of four CpG islands within *cebpa* regulation region of *cmyb*-EGFP positive cells sorted from WT

embryos and Dnmt1 morphants. Each line represents an individual sequenced clone. White circles denote unmethylated CpG dinucleotides, black circles denote methylated CpG ones.

**Figure S7. WISH assays of hepatocyte marker *lfabp* and pancreas marker *trypsin*.** The expressions of *lfabp* and *trypsin* were clearly decreased in ldd794 mutants. Note that SUMO2-C/ebpa was unable to rescue the development defects of liver and pancreas.

**Figure S8. WISH assays of *cmyb* in *cebpa* null mutants and siblings with or without *dnmt1* knock down.** (A) WISH assay of *cmyb* in siblings. (B) WISH assay of *cmyb* in siblings injected with *dnmt1* morpholino. Note that *cmyb* was markedly decreased. (C) WISH assay of *cmyb* in *cebpa* null mutants. (D) WISH assay of *cmyb* in *cebpa* null mutants injected with *dnmt1* morpholino. Note that *cmyb* was comparable with un-injected siblings. (A'-D') Magnified images of the boxed regions in A to D respectively. Red arrows indicate *cmyb*-positive HSPCs in the CHT.
